# Supplementary material for: Alcohol potentiates a pheromone signal in flies
Source: eLife. 2020 Nov 3;9:e59853. doi: 10.7554/eLife.59853 (PMC7671682; doi:10.7554/eLife.59853)
Supplement: Source data 1. [file elife-59853-data1.xlsx]

## Sheet: Fig 1b
0%	5%	10%	20%
-0.00386648	0.00484533	0.00198218	0.0046985
-0.000489431	0.000513895	0.00163958	0.00195771
0.00137039	0.000489424	0.00442931	0.00565288
0.000538366	0.00386647	0.000513895	0.00849156
-0.00467403	0.00513898	0.00222689	0.00550605
-0.00012236	-0.00029366	0.00266737	0.00665621
-0.000905444	0.0029855	0.00557946	0.00425801
0.0080266	-0.000758616	0.00274079	0.0071701
-0.00335258	0.00550605	0.0033281	0.00506557
0.000832023	0.000660723	-0.00138	0.00570182
0.00203112	0.000489424	-0.001385	0.00403777
0.00061178	-0.00185983		0.011575

## Sheet: Fig 1c
Time Spent Fighting
Control	5% Ethanol Food	10% Ethanol Food	20% Ethanol Food
35	105	49	13
12	1	43	151
4	46	126	23
42	246	46	225
57.5	225	106	16
20.5	140	103	0
2	104	16	4
102	256	23	49
76.5	108.5	151	37
43.5	151.5	126	11
84	56	10.5
36	124	98
2	69.5	46.5
168.5	148	90.5
46.5	46.5
57.5	141
26.5	13
134.5	211.5
17.5	31
105	22.5

## Sheet: Fig 1d
Number of Fights
Control	5% Ethanol Food	10% Ethanol Food	20% Ethanol Food
0	62.5	13	6
0	7.5	1	7
0	0	7	14
0	4.5	19	46
0	50.5	9	0
0	57.5	0	0
0	0	8	0
0	45	2	1
0	12	16	2
2	6.5	6	0
3	13	0
3	60	15
3	4	1
8	74	1.5
8	0
9	24
19	0
0	0.5
0	0
0	20.5

## Sheet: Fig 1e
Lunges
Control	5% Ethanol Food	10% Ethanol Food	20% Ethanol Food
0	62.5	13	6
0	7.5	1	7
0	0	7	14
0	4.5	19	46
0	50.5	9	0
0	57.5	0	0
0	0	8	0
0	45	2	1
0	12	16	2
2	6.5	6	0
3	13	0
3	60	15
3	4	1
8	74	1.5
8	0
9	24
19	0
0	0.5
0	0
0	20.5

## Sheet: Fig 1f
Latency Lunge
Control	5%	10%	20% Ethanol Food
147	159	150	164.5
170	220.5	220.5	252.5
548	260.5	377	460.5
700	307.5	418	754.5
861	361.5	435.5	1206
915	463	471.5	1586
1417	463.5	474.5	1800
1585	555	589.5	1800
1800	560	667	1800
1800	677.5	798	1800
1800	729	1054
1800	798.5	1375
1800	856	1800
1800	1533.5	1800
1800	1660.5
1800	1800
1800	1800
1800	1800
1800	1800
1800	1800

## Sheet: Fig 1g
Proportion Lunged		Cumulative Fraction Lunged
Time of Lunge	Control	0.05	0.1	0.2
147	0.0526316
170	0.105263
548	0.157895
700	0.210526
861	0.263158
915	0.315789
1417	0.368421
1585	0.421053
1800	0.42105
1800	0.42105
1800	0.42105
1800	0.42105
1800	0.42105
1800	0.42105
1800	0.42105
1800	0.42105
1800	0.42105
1800	0.42105
1800	0.42105
159		0.0416667
220.5		0.0833333
260.5		0.125
307.5		0.166667
361.5		0.208333
463		0.25
463.5		0.291667
555		0.333333
560		0.375
677.5		0.416667
729		0.458333
798.5		0.5
856		0.541667
1533.5		0.583333
1660.5		0.625
1800		0.625
1800		0.625
1800		0.625
1800		0.625
1800		0.625
1800		0.625
1800		0.625
1800		0.625
1800		0.625
150			0.0714286
220.5			0.142857
377			0.214286
418			0.285714
435.5			0.357143
471.5			0.428571
474.5			0.5
589.5			0.571429
667			0.642857
798			0.714286
1054			0.785714
1375			0.857143
1800			0.85714
1800			0.85714
164.5				0.0909091
252.5				0.181818
460.5				0.272727
754.5				0.363636
1206				0.454545
1586				0.545455
1800				0.545454
1800				0.545454
1800				0.545454
1800				0.545454
1800				0.545454

## Sheet: Fig 2c
Del Spikes
Pre-Air	Post-Air	Pre-30%	Post-30%	Pre-5%	Post-5%
21	35	44	51	14	32
29	42	18	43	16	22
24	28	46	66	22	25
16	31	13	20	15	12
20	27	18	15	13	22
28	18	31	39	28	53
31	41	29	56	23	23
32	41	23	25
19	28	25	46
20	18	20	13
32	39	19	31
20	16	15	18
19	15	32	33
17	20	14	24
22	22	28	56

## Sheet: Fig 2d
Spontaneous Activity
Pre-Air	During Air	Post-Air	Pre-30%	During 30%	Post-30%	Pre 5%	During 5%	Post-5%
5.9	6.1	5.9	0.5	7.95	9.8	0.3	1.75	8.2
0.1	0.1	0.7	0.5	11.4	10.4	1.4	1.45	5.3
3.5	4.75	4.5	6.4	3.8	54.1	1.2	11.95	29.1
1	3.95	4.2	6.4	2.1	12.9	4.3	7.85	7.7
3.6	5.35	4.5	2.4	6.3	13.8	1.2	3.15	8.3
0	2.55	0.1	2.9	5.55	20.7	3.1	9.7	20.4
0.2	0.55	0.2	2.1	1.1	7.2	3.6	4.95	11.5
0.2	0.3	0.1	2.7	0.9	11.9
0.5	1.7	1.9	0.3	5.2	3.3
1.1	2.9	1.6	1.4	8.5	19.9
1.4	2.7	6.2	0.8	1.75	9.5
3.5	2.8	4.2	2.6	7	10.5
4	3.5	4.3	0.5	5.05	8.4
3	1.2	3.1	5.5	6.6	7
4.1	6	5.1	11.7	11.9	6.8

## Sheet: Fig 2e
	Pre Air																Post Air
	1	0	4	0	0	0	0	0	0	0	1	6	2	0			0	1	0	3	0	0	0	0	0	0	5	1	0	2
	3	0	0	1	8	0	0	0	0	0	1	0	2	3			0	3	0	6	0	1	0	0	0	0	6	2	3	7
	4	0	0	0	1	0	0	0	0	0	0	1	2	2			2	1	0	6	0	0	0	0	0	1	2	2	5	0	2
	1	1	0	1	0	0	0	0	0	0	0	3	3	1			0	2	0	0	0	0	0	0	1	2	0	2	2	5	0
	1	0	3	0	2	0	2	2	0	0	4	0	0	1			0	3	6	0	0	0	0	0	0	0	0	1	1	1	2
	1	0	5	0	0	0	0	0	0	0	0	6	1	1			0	1	5	0	0	0	0	4	0	0	1	2	3	0	0
	1	0	0	1	4	0	0	0	0	0	3	1	4	0			0	3	0	1	0	0	0	6	0	0	2	1	2	0	3
	2	0	1	1	2	0	0	0	0	0	0	0	0	0	0		0	0	5	1	0	0	0	0	1	0	0	2	0	4	11
	0	0	6	0	4	0	0	0	0	0	0	0	1	0	0		0	5	2	0	0	0	0	0	0	6	6	2	5	2	3
	0	0	0	0	1	0	0	0	0	0	0	0	1	4	2		1	0	0	1	0	0	0	0	4	5	0	1	1	2	4
	4	0	0	0	0	0	0	0	0	0	1	2	1	0	4		1	0	0	2	0	0	0	0	4	6	6	2	1	2	0
	8	0	0	2	3	0	0	0	0	1	0	0	3	3	2		0	4	7	9	0	0	0	0	1	2	0	4	0	8	1
	0	0	10	1	0	0	0	0	3	0	0	5	1	0	6		1	0	1	2	0	1	1	1	1	1	0	1	0	2	3
	0	0	0	0	1	0	0	0	2	6	1	0	3	0	6		1	8	0	0	0	0	0	1	0	7	0	1	2	1	5
	2	0	6	0	2	0	0	0	0	4	0	0	1	3	9		0	4	1	5	0	0	0	0	0	3	0	3	4	5	7
	2	0	0	1	2	0	0	0	0	0	0	0	1	0	4		0	6	4	1	0	0	0	0	0	6	0	2	0	0	0
	9	0	0	0	0	0	0	0	0	0	0	0	1	0	2		0	3	4	0	0	0	0	0	2	5	11	3	2	7	0
	10	0	0	2	6	0	0	0	0	0	0	4	10	4	2		0	0	1	4	0	0	0	3	1	5	3	3	0	0	4
	2	0	0	0	0	0	0	0	0	0	0	4	2	7	4		1	1	3	2	0	0	0	3	0	0	0	2	0	0	0
	8	0	0	0	0	0	0	0	0	0	3	3	1	1	0		0	0	3	2	1	0	0	1	1	13	0	6	0	3	0
	26	26	25	17	21	24	25	26	19	18	18	21	15	17	15		30	29	24	25	18	28	28	21	19	15	18	10	17	18	9
	1	3	2	0	3	4	6	6	0	3	15	2	8	3	11		13	3	11	6	0	13	13	9	1	30	2	9	6	9	5
	1	0	1	0	1	0	1	1	1	0	8	0	5	1	6		2	5	4	4	0	8	8	2	4	7	7	0	2	1	37
	5	2	1	0	3	0	2	2	0	0	6	0	0	1	3		4	0	0	4	0	4	4	0	0	7	1	6	1	1	4
	2	0	0	0	1	1	0	0	0	0	2	0	4	1	6		1	2	7	5	0	4	3	0	2	0	0	1	0	0	0
	6	0	5	0	0	1	0	0	0	0	1	2	1	0	2		0	0	0	2	0	0	0	0	0	0	2	3	3	2	4
	2	0	2	6	2	4	0	0	0	0	0	5	5	0	0		0	0	6	2	0	0	0	0	5	3	5	2	1	2	3
	7	0	3	3	3	0	2	0	2	0	3	3	0	0	4		1	4	2	4	0	0	0	0	3	2	1	3	2	6	3
	0	0	2	5	1	0	0	2	0	0	2	4	0	3	0		0	2	0	0	0	0	0	0	0		0	2	1	4	0
	2	0	0	2	4	0	0	0	0	0	2	0	1	0	0		0	2	2	3	0	0	0	0	0	7	0	3	0	6	0
	9	0	0	0	0	0	0	0	0	0	10	2	1	0	5		0	3	6	4	0	0	0	0	0	6	0	1	0	4	0
	3	0	5	0	2	0	0	0	0	0	3	3	1	0	3		0	2	1	1	0	0	0	0	0	3	0	3	2	3	0
	1	0	1	1	9	0	0	0	3	3	2	0	2	2	0		0	0	0	5	4	0	0	0	4	8	0	2	2	4	0
	2	0	0	0	0	0	0	0	3	0	1	0	0	0	0		0	0	4	0	0	0	0	0	2	6	1	1	0	2	3
	2	0	2	1	1	0	1	1	0	0	0	0	1	2	3		0	1	0	3	0	0	0	2	3	2	6	3	2	4	1
	10	0	0	1	5	6	1	1	0	5	1	6	2	1	0		0	0	1	3	0	0	0	2	2		1	3	1	2	4
	3	0	6	5	1	0	0	0	0	1	1	1	2	0	3		0	0	1	9	0	0	0	4	0	0	4	2	1	2	2
	1	2	0	8	2	0	0	0	0	0	0	4	1	5	0		0	2	2	1	0	0	0	0	0	0	2	3	0	1	1
	6	0	0	4	7	0	0	0	0	3	1	0	3	5	0		0	1	0	1	0	1	1	0	0	0	0	2	0	0	6
	0	0	5	0	9	0	3	3	0	2	15	7	2	1	1		0	0	6	0	0	1	1	0	1	7	0	1	1	5	1
																															2
																															4

## Sheet: Fig 2f
	pre 30%																Post 30%
	1	0	0	8	0	1	1	1	0	0	0	0	0	3	4		3	1	24	0	1	4	17	0	2	10	3	10	1	0	5
	3	1	3	0	1	0	1	0	0	0	0	1	0	2	0		4	0	24	0	1	6	9	0	0	11	4	5	3	6	1
	0	0	2	7	4	3	0	0	0	3	0	2	0	0	0		4	6	21	12	10	6	1	9	2	14	8	1	4	7	1
	0	0	6	3	3	0	3	0	0	2	0	0	0	2	7		4	4	33	9	10	12	3	13	1	14	7	7	5	2	12
	0	0	4	3	0	0	0	0	0	0	0	6	0	2	9		4	0	33	9	4	7	7	3	0	9	1	2	4	2	9
	0	0	2	1	3	0	0	1	0	0	0	2	0	0	3		5	6	32	7	1	19	4	11	3	7	5	0	5	0	5
	0	0	0	5	2	1	0	1	0	0	0	1	0	2	2		0	9	27	8	5	16	1	1	0	12	5	10	3	4	0
	0	0	5	13	0	0	5	2	0	0	6	0	0	7	4		12	5	24	5	14	15	1	9	4	11	0	2	4	10	0
	0	0	3	0	0	5	1	2	0	0	0	2	0	5	9		7	1	27	10	12	15	6	9	2	9	9	9	4	2	0
	0	0	4	1	0	0	0	2	0	0	0	5	0	4	9		1	2	35	0	6	11	1	7	3	10	6	12	4	0	0
	0	0	4	2	0	5	0	1	0	0	0	0	2	3	2		2	1	26	2	13	5	1	7	0	8	5	12	6	2	0
	1	0	4	4	0	6	0	2	2	5	0	0	1	2	9		1	9	27	8	6	4	0	8	7	10	13	2	5	0	1
	0	1	1	4	4	0	1	1	1	0	0	0	2	6	9		1	9	34	0	5	11	5	11	3	9	3	10	4	5	2
	0	0	5	3	2	0	6	3	0	0	0	3	0	0	9		2	8	30	17	4	13	0	7	0	10	4	4	5	10	6
	0	0	1	0	1	3	0	0	0	1	0	0	0	2	9		9	9	24	15	8	17	1	8	1	9	4	2	3	4	13
	0	1	3	1	0	0	0	2	0	3	0	1	0	4	9		12	8	26	3	6	9	8	4	2	13	1	0	5	9	8
	0	2	12	4	0	0	3	2	0	0	2	1	0	2	5		11	7	27	5	6	10	4	2	1	9	3	11	5	3	1
	0	0	0	3	0	3	0	4	0	0	0	2	0	3	5		6	4	21	7	6	12	0	5	0	8	1	0	5	0	4
	0	0	1	0	1	0	0	2	0	0	0	0	0	3	4		5	5	26	10	8	8	1	3	1	8	5	5	5	1	0
	0	0	4	2	3	2	0	1	0	0	0	0	0	3	9		5	10	20	2	12	7	2	2	1	8	8	1	4	3	0
	27	10	30	18	19	34	30	18	19	18	16	10	24	17	24		23	17	54	18	18	36	45	17	27	21	22	18	15	21	15
	17	8	22	1	1	0	1	8	6	3	4	8	8	2	16		38	36	66	15	11	24	18	20	22	12	18	10	26	10	48
	4	4	4	3	1	2	0	1	9	2	1	1	1	3	4		26	26	61	5	7	14	5	8	8	6	13	4	12	2	31
	2	2	4	5	2	0	0	0	0	1	3	2	1	2	5		23	9	54	12	8	9	4	5	14	9	8	9	11	0	29
	1	1	2	2	0	1	3	1	0	0	0	2	0	0	4		19	11	57	11	5	12	7	14	5	5	3	1	9	4	8
	0	0	5	0	0	2	0	0	0	0	0	0	0	0	4		17	6	57	6	1	3	2	2	6	6	0	1	8	0	12
	0	0	1	4	1	2	3	0	0	0	0	0	0	8	0		9	6	48	7	3	8	8	2	13	7	7	5	11	1	22
	0	0	1	0	1	1	0	1	0	0	1	1	0	5	0		15	4	43	10	8	9	1	6	8	9	9	7	2	4	2
	2	1	5	4	3	2	2	1	1	0	1	5	0	4	3		6	5	52	4	3	14	12	7	0	9	4	7	8	3	13
	4	1	3	1	0	4	4	0	0	0	1	1	0	1	0		12	2	44	10	10	13	0	2	2	6	2	2	6	4	18
	4	0	1	4	0	1	1	1	0	0	3	0	0	3	5		10	7	42	2	5	11	0	9	1	5	2	7	9	4	7
	2	0	14	3	0	4	3	2	0	0	0	0	0	0	3		0	6	38	10	4	14	6	3	0	7	4	8	7	5	5
	0	1	6	8	2	7	2	1	0	0	0	6	1	0	0		0	2	41	1	4	10	14	13	0	3	3	6	5	5	9
	0	0	1	3	3	0	1	5	3	3	0	0	0	3	0		0	4	35	13	5	10	8	11	1	6	0	5	6	0	12
	1	4	3	2	0	1	0	4	2	1	1	1	0	9	0		0	4	40	7	7	12	3	7	1	4	2	2	2	0	17
	0	3	5	5	3	0	0	2	0	0	0	0	0	0	0		0	2	41	10	12	7	0	5	0	8	4	9	10	7	18
	0	0	5	0	4	4	7	0	0	0	1	1	1	3	7		0	4	38	6	10	3	7	11	0	5	2	8	3	4	14
	0	4	2	0	3	0	1	0	0	0	0	1	0	3	2		0	3	38	4	6	1	0	6	0	4	2	3	6	0	8
	1	0	4	3	1	4	2	0	0	0	0	1	0	0	0		0	10	41	11	1	5	4	5	4	4	7	3	4	8	12
	2	0	0	0	4	6	0	2	0	2	0	0	0	2	6		0	9	36	6	8	3	1	3	4	4	0	0	8	5	4

[truncated: 5 more sheets: Fig 2g, Fig 2h, Fig 3a, Fig 3b, Fig 3f]
